# Supplementary material
Source: PubMed Central journal article supplement (PMC2678460)
Supplement: 0900952106_0900952106SI.pdf [file 0900952106_0900952106SI.pdf]

# Supporting Information

Fukushima et al. 10.1073/pnas.0900952106

## SI Methods

**Metabolite Profiling.** Each sample was extracted, derivatized, and analyzed by using GC-TOF/MS as described (1–4). Each sample was used 5 mg fresh weight of tissues for Design 1 (Fig. S2A) and 10 mg fresh weight of tissues for Design 2 (Fig. S2B) for GC-TOF/MS analysis. Finally, 56  $\mu$ g fresh weight of the derivatized extract was injected by using GC-TOF/MS for Design 1 and 167  $\mu$ g for Design 2. Nonprocessed raw data were treated by using a custom script described by Jonsson et al. (1, 2) to perform baseline correction, alignment, and peak deconvolution. Metabolites were identified by comparing their mass spectrum and retention time index (RI) with those generated for authentic compounds analyzed on our instrumentation as well as those in the MS and RI libraries in the Golm Metabolome Database (5–7). The data were obtained from 6 analytical runs in Design 1 and 3 runs in Design 2, performed on a different day. Because changes in signal intensity for each peak generally appear as a result of sample derivatization and/or MS detector sensitivity, a direct comparison among results obtained from different analytical runs is not entirely appropriate. To overcome this problem, the data were normalized by using the mean normalized response calculated for the WT control in each measured batch run, according to a method described in ref. 8.

**Transcript Profiling.** Comprehensive transcript profiling was performed by using ATH1 GeneChips (Affymetrix). Biological replicates ( $n = 3$ ) were sampled and analyzed four times [Zeitgeber time (ZT) 8, 10, 12, and 14 h; see Fig. S2B] in the

diurnal cycle in wild-type (WT) and *d975*. All raw CEL files have been deposited in the Nottingham Arabidopsis Stock Center's microarray database (NASCArrays) under accession number NASCARRAYS-421 (9). Raw CEL files were normalized by robust multiarray average (RMA) (10) with Bioconductor Simpleaffy package (11). Data quality for all GeneChips was assessed by using functions in the Bioconductor AffyPLM package. The mapping of Affymetrix probe set IDs to AGI locus codes was performed by using TAIR7 (2007/05/02) (12). Gene functional classifications and visualizations were based on the ontology tool MapMan (13) and TAIR7.

**Evolutionary Analysis.** To explore the evolutionary relationships among the distinct pseudo-response regulators (PRRs), phylogenetic analysis was performed on 23 PRR protein sequences from seven plant species (*Arabidopsis thaliana*, *Oryza sativa*, *Populus trichocarpa*, *Carica papaya*, *Vitis vinifera*, *Medicago trunculata*, and *Sorghum bicolor*). Multiple alignments of amino acid sequences and phylogenetic tree creation with bootstrapping were generated by using ClustalW2 and TreeView. The amino acid sequences in *Arabidopsis* and rice were obtained from UniProt: AtPRR9, AtPRR7, AtPRR5, AtPRR3, and AtPRR1 (TOC1) in *Arabidopsis*, Q8L500, Q93WK5, Q6LA42, Q9LVG4, and Q9LKL2, respectively; and OsPRR95, OsPRR73, OsPRR59, OsPRR37, and OsPRR1/OsTOC1 in rice, Q689G6, Q10N34, Q0IUG8, Q0D3B6, and Q689G9, respectively. Other sequences of putative PRRs were from Plant Genome Duplication Database (PGDD) (<http://chibba.agtec.uga.edu/duplication/>) (14).

1. Jonsson P, et al. (2004) A strategy for identifying differences in large series of metabolomic samples analyzed by GC/MS. *Anal Chem* 76:1738–1745.
2. Jonsson P, et al. (2006) Predictive metabolite profiling applying hierarchical multivariate curve resolution to GC-MS data: A potential tool for multi-parametric diagnosis. *J Proteome Res* 5:1407–1414.
3. Kusano M, et al. (2007) Application of a metabolomic method combining one-dimensional and two-dimensional gas chromatography-time-of-flight/mass spectrometry to metabolic phenotyping of natural variants in rice. *J Chromatogr B* 855:71–79.
4. Kusano M, et al. (2007) Unbiased characterization of genotype-dependent metabolic regulations by metabolomic approach in *Arabidopsis thaliana*. *BMC Syst Biol* 1:53.
5. Wagner C, Sefkow M, Kopka J (2003) Construction and application of a mass spectral and retention time index database generated from plant GC/EI-TOF-MS metabolite profiles. *Phytochemistry* 62:887–900.
6. Schauer N, et al. (2005) GC-MS libraries for the rapid identification of metabolites in complex biological samples. *FEBS Lett* 579:1332–1337.
7. Kopka J, et al. (2005) GMD@CSB.DB: The Golm Metabolome Database. *Bioinformatics* 21:1635–1638.
8. Roessner U, et al. (2001) Metabolic profiling allows comprehensive phenotyping of genetically or environmentally modified plant systems. *Plant Cell* 13:11–29.
9. Nakamichi N, et al. (2009) Transcript profiling of an *Arabidopsis* PSEUDO RESPONSE REGULATOR arrhythmic triple mutant reveals a role for the circadian clock in cold stress response. *Plant Cell Physiol* 50:447–462.
10. Irizarry RA, et al. (2003) Exploration, normalization, and summaries of high-density oligonucleotide array probe level data. *Biostatistics* 4:249–264.
11. Wilson CL, Miller CJ (2005) Simpleaffy: A Bioconductor package for Affymetrix quality control and data analysis. *Bioinformatics* 21:3683–3685.
12. Garcia-Hernandez M, et al. (2002) TAIR: A resource for integrated *Arabidopsis* data. *Funct Integr Genomics* 2:239–253.
13. Thimm O, et al. (2004) MapMan: A user-driven tool to display genomics datasets onto diagrams of metabolic pathways and other biological processes. *Plant J* 37:914–939.
14. Tang H, et al. (2008) Synteny and collinearity in plant genomes. *Science* 320:486–488.
15. Mockler TC, et al. (2007) The DIURNAL project: DIURNAL and circadian expression profiling, model-based pattern matching, and promoter analysis. *Cold Spring Harbor Symp Quant Biol* 72:353–363.
16. Michael TP, et al. (2008) Network discovery pipeline elucidates conserved time-of-day-specific cis-regulatory modules. *PLoS Genet* 4:e14.
17. Smith SM, et al. (2004) Diurnal changes in the transcriptome encoding enzymes of starch metabolism provide evidence for both transcriptional and posttranscriptional regulation of starch metabolism in *Arabidopsis* leaves. *Plant Physiol* 136:2687–2699.
18. Blasing OE, et al. (2005) Sugars and circadian regulation make major contributions to the global regulation of diurnal gene expression in *Arabidopsis*. *Plant Cell* 17:3257–3281.
19. Storey JD, Tibshirani R (2003) Statistical significance for genomewide studies. *Proc Natl Acad Sci USA* 100:9440–9445.
20. Nakamichi N, Kita M, Ito S, Yamashino T, Mizuno T (2005) PSEUDO-RESPONSE REGULATORS, PRR9, PRR7 and PRR5, together play essential roles close to the circadian clock of *Arabidopsis thaliana*. *Plant Cell Physiol* 46:686–698.
21. Wang ZY, Tobin EM (1998) Constitutive expression of the CIRCADIAN CLOCK-ASSOCIATED 1 (CCA1) gene disrupts circadian rhythms and suppresses its own expression. *Cell* 93:1207–1217.
22. Sugano S, Andronis C, Green RM, Wang ZY, Tobin EM (1998) Protein kinase CK2 interacts with and phosphorylates the *Arabidopsis* circadian clock-associated 1 protein. *Proc Natl Acad Sci USA* 95:11020–11025.

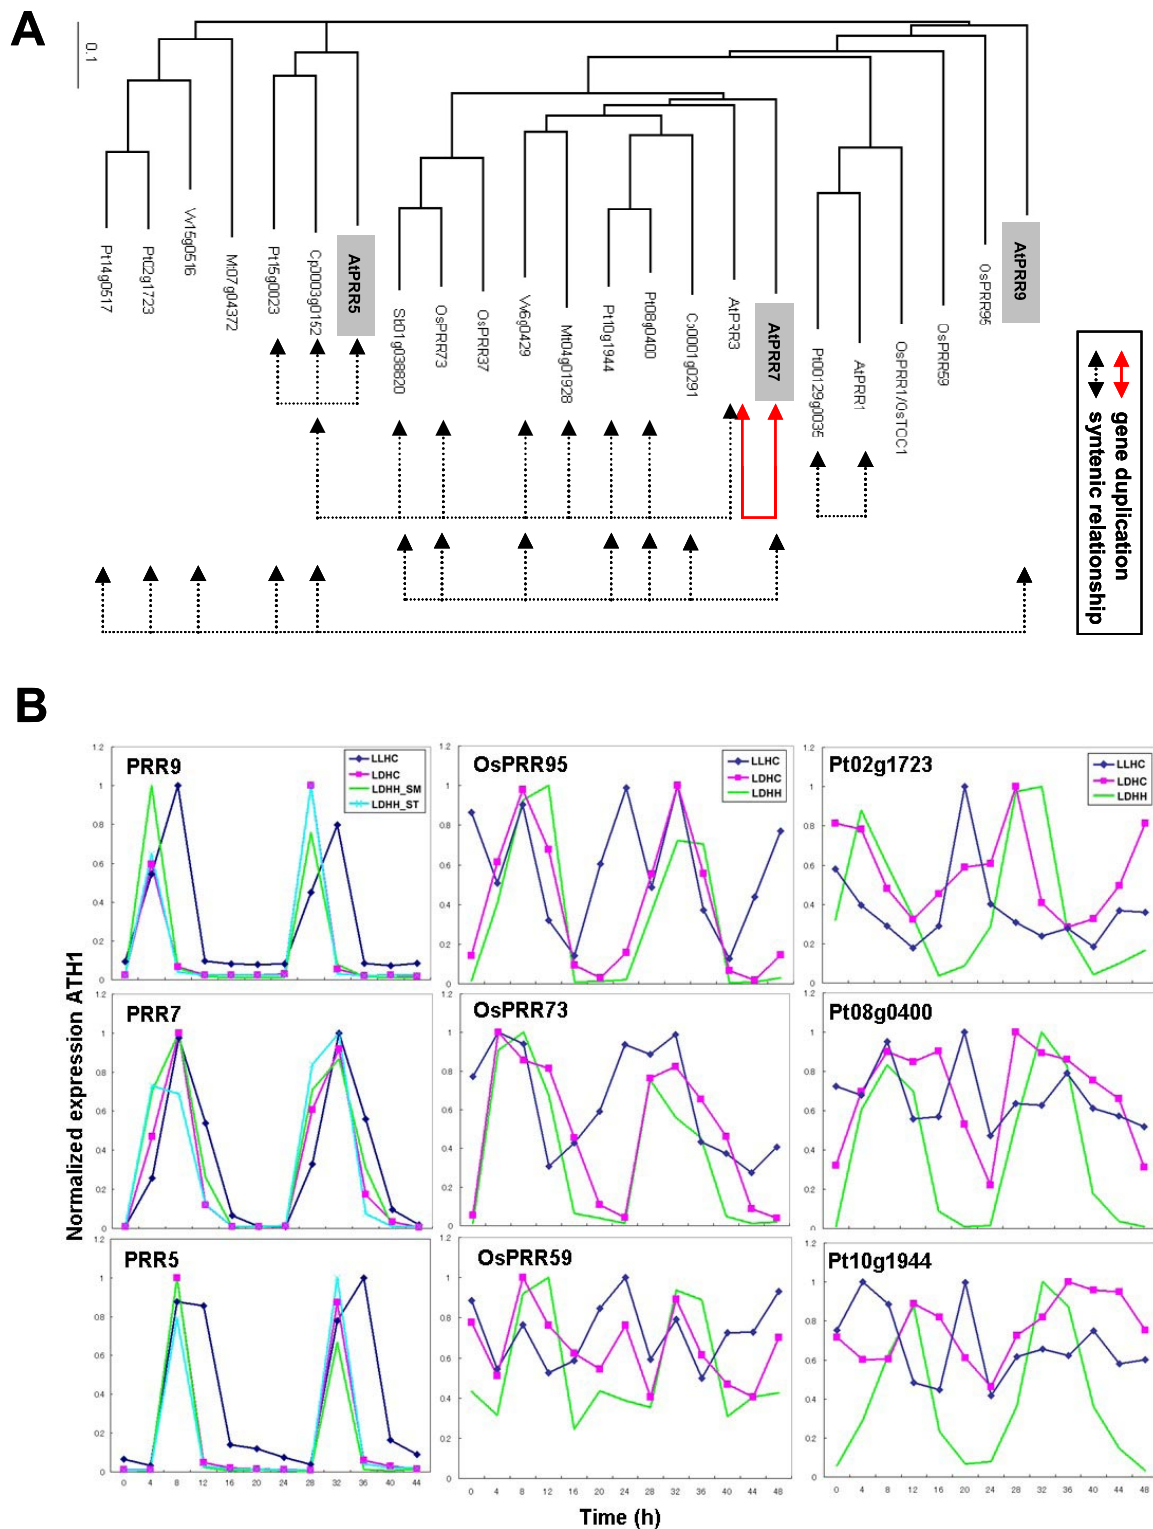

**Fig. S1.** Evolutionary conservation in PRR sequences and rhythmic expression pattern in higher plants. (A) Phylogenetic relationship of the PRR proteins in seven species: *Arabidopsis thaliana* (At), *Oryza sativa* (Os), *Populus trichocarpa* (Pt), *Carica papaya* (Cp), *Vitis vinifera* (Vv), *Medicago trunculata* (Mt), and *Sorghum bicolor* (Sb). (B) Comparison of diurnal changes in transcript levels for PRRs using DIURNAL database (15) (<http://diurnal.cgrb.oregonstate.edu/>), which provided circadian/diurnal gene expression data for *Arabidopsis*, rice, and poplar genes. The retrieval parameters used were; "Basic Search," "Normalized data," and "Use data." The experimental conditions and microarray datasets used were LDHH, LDHC, and LLHC (16). ZT, Zeitgeber time; LD, light/dark cycle; LL, continuous light; HC, hot/cold; HH, continuous hot. LDHH.SM (Smith) and LDHH.ST (Stitt) were described (17, 18). These genome-scale data suggest that the three PRR genes are evolutionarily conserved in sequence homology and gene expression patterns.

**A****Design 1 (LD, LL1, and LL2)**

genotypes: wild-type, *d975*, and *CCA1-ox*  
 total 24 sampling time points  
 plants were harvested at 3 h intervals

↑ data point  
 for analysis

**(1) LD (during diurnal cycle)**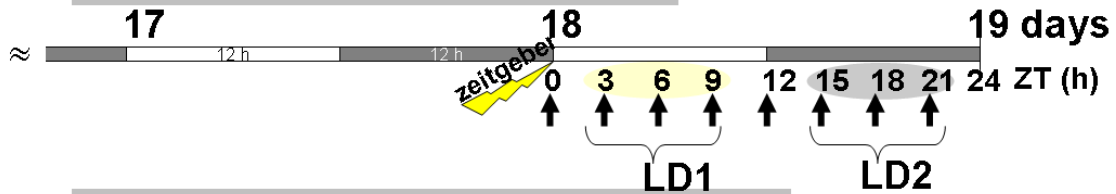**(2) LL1 (under continuous light 1)**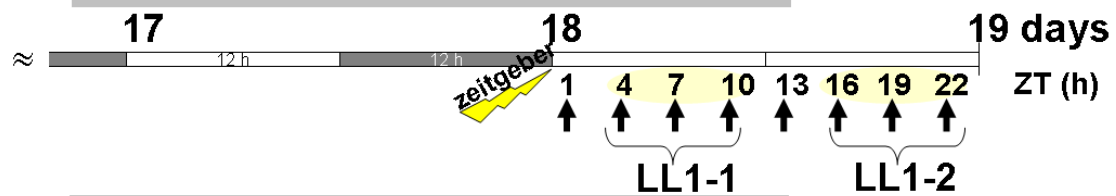**(3) LL2 (under continuous light 2)**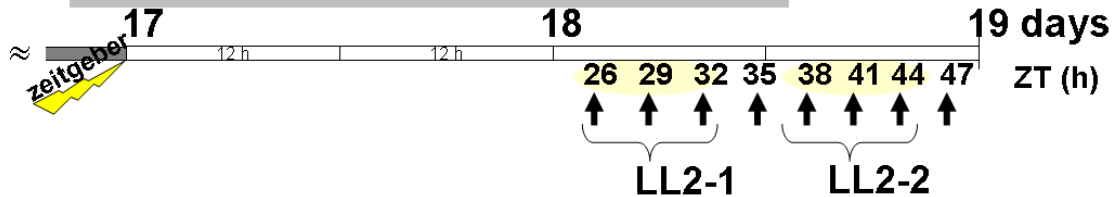**B****Design 2 (LD)**

genotypes: wild-type and *d975*  
 4 sampling time points for expression and 7 for metabolite  
 plants were harvested at 2 h intervals

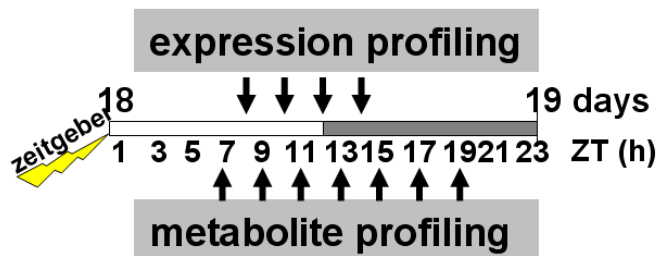

**Fig. S2.** Experimental design and sampling scheme. The two experiments were designed to perform transcript and metabolite profiling in both LD, light/dark cycle, and LL, continuous light. (A) Metabolite phenotyping of three genotypes (WT, *d975*, and *CCA1-ox*) under LD and LL are illustrated (Design 1). (B) Both transcript and metabolite profiling from Zeitgeber Time (ZT) 7 to ZT 19 under LD cycle are Design 2. This time series experiment had a higher resolution than that of Design 1.





# A (continued)

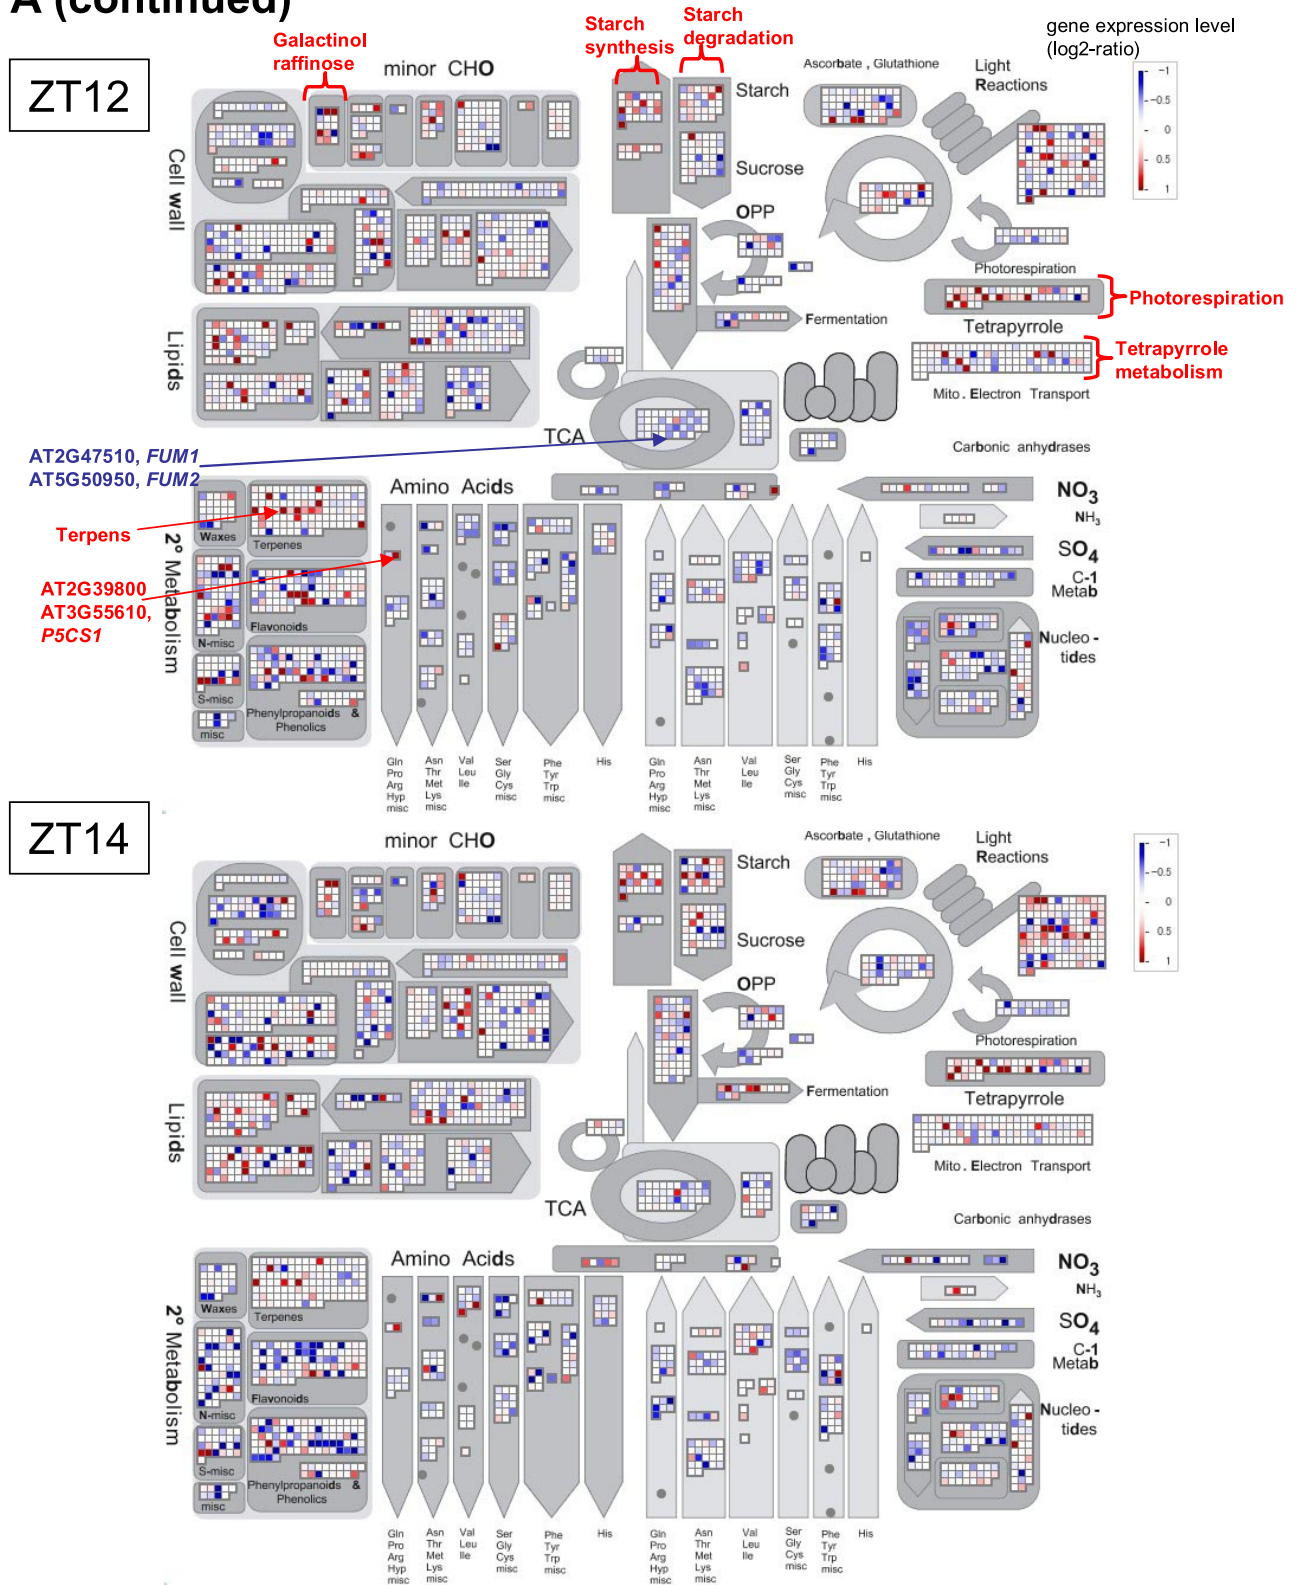

Fig. S4 continued.

## B TCA cycle

ZT8

ZT10

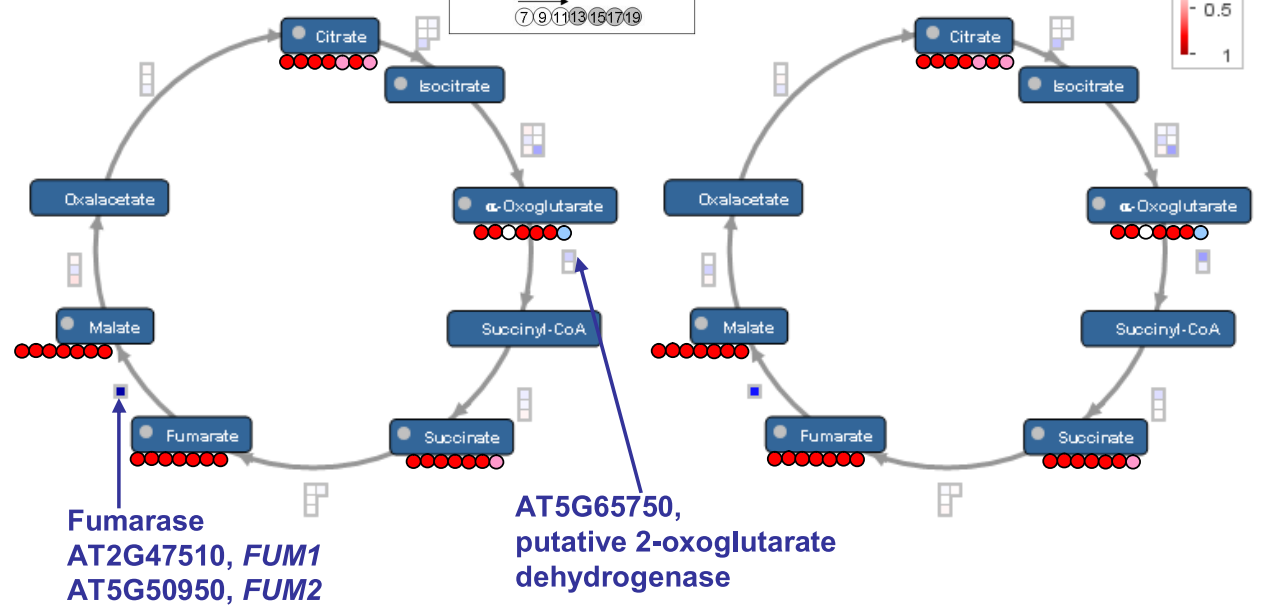

ZT12

ZT14

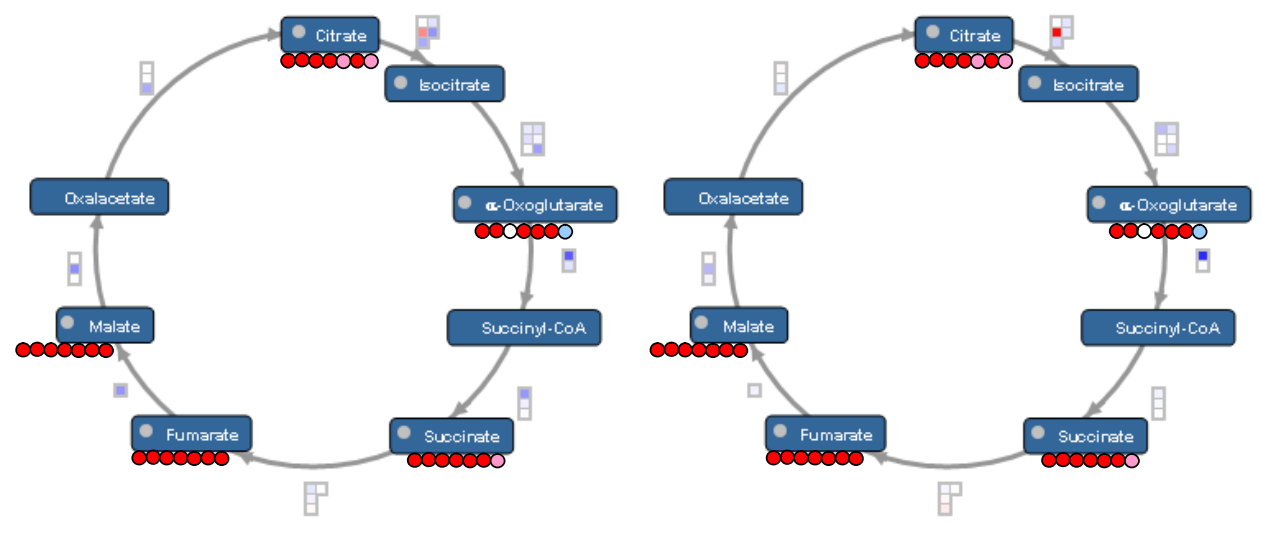

Fig. S4 continued.

C

### Tetrapyrrole biosynthetic pathway

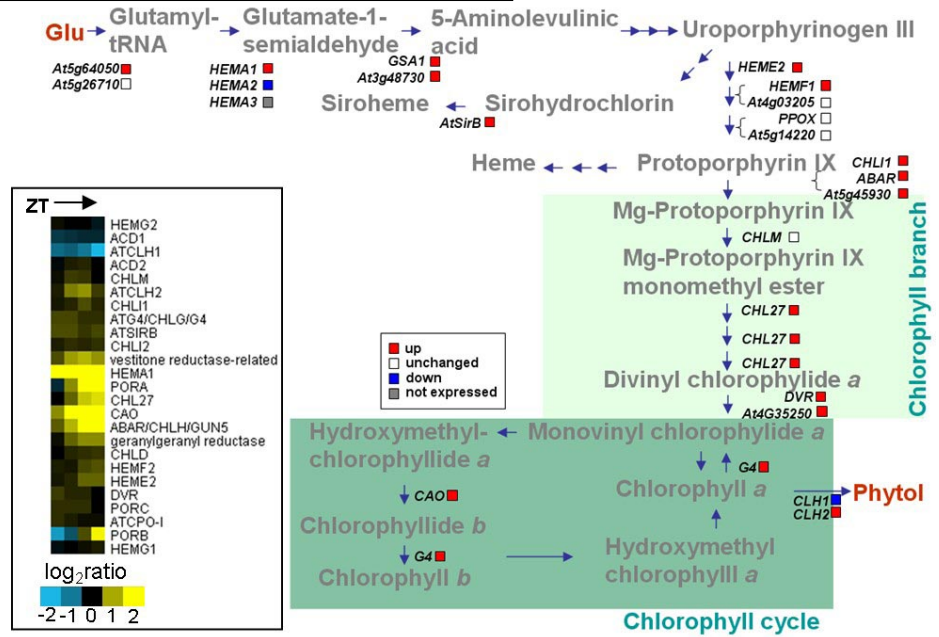

### Tocopherol biosynthetic pathway

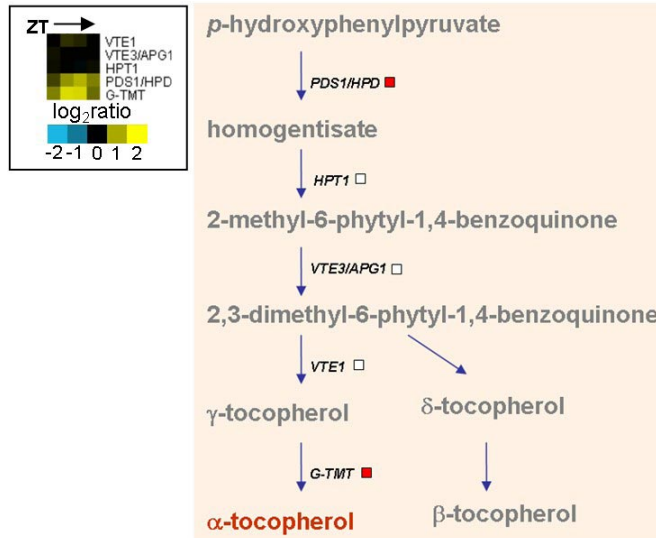

Fig. S4 continued.



**Table S1. Phenotypes of two arrhythmic mutants analyzed in this work**

| Characteristic          | <i>d975</i>                                                                          | <i>CCA1-ox</i>                       |
|-------------------------|--------------------------------------------------------------------------------------|--------------------------------------|
| Genetic modification    | Knockout of <i>PRR9</i> , <i>PRR7</i> , and <i>PRR5</i> genes                        | <i>CCA1</i> -overexpressor           |
| Rhythm of expression    | Arrhythmic (in LL or DD)                                                             | Arrhythmic (in LL or DD)             |
| Morphological phenotype | Long hypocotyl, dark green leaves (in mature stage),<br>and various stress tolerance | Long hypocotyl and dark green leaves |
| Light                   | Hyposensitivity to red light                                                         | Hyposensitivity to red light         |
| Flowering               | Late                                                                                 | Late                                 |
| Refs.                   | 9, 20                                                                                | 21, 22                               |

## Other Supporting Information Files

[Dataset S1](#)

[Dataset S2](#)

[Dataset S3](#)

[Dataset S4](#)

[Dataset S5](#)
